# Supplementary material
Source: PubMed Central journal article supplement (PMC3811435)
Supplement: AAC.00822-13_zac010132212so1.pdf [file AAC.00822-13_zac010132212so1.pdf]

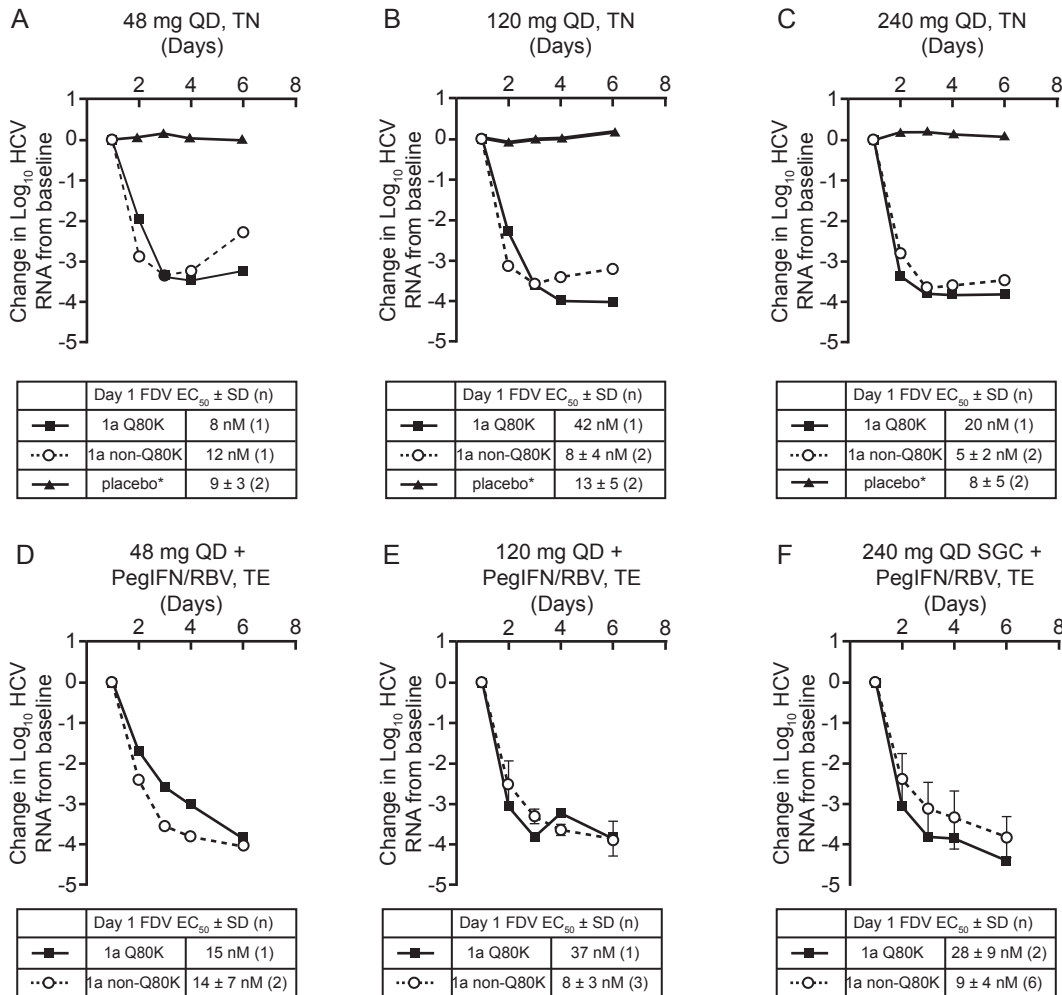

Supplementary FIG 1. Initial viral load decline (days 1 to 6) in GT-1a-infected patients with and without baseline NS3 Q80K virus. Individual patient baseline samples were phenotyped in  $n \geq 3$  independent experiments; and the tables below the graphs show the weighted mean EC<sub>50</sub> ± standard deviation (SD) of faldaprevir (FDV) for GT-1a baseline samples within the dose group calculated. n = number of patients with VL and EC<sub>50</sub> data shown. \*Placebo includes GT1b and/or GT1a patients.

20 mg QD, TN  
(Days)

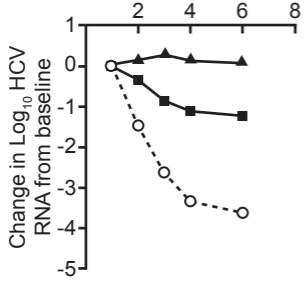

|   | Day 1 FDV EC <sub>50</sub> ± SD (n) |              |
|---|-------------------------------------|--------------|
| ■ | 1b V170T                            | 63 nM (1)    |
| ○ | 1b non-V170T                        | 7 ± 6 nM (2) |
| ▲ | placebo*                            | 9 ± 2 (2)    |

Supplementary FIG 2. Initial viral load decline (days 1 to 6) in GT-1b-infected patients with and without baseline NS3 V170T virus. Individual patient baseline samples were phenotyped in  $n \geq 3$  independent experiments; and the tables below the graphs show the weighted mean EC<sub>50</sub> ± standard deviation (SD) of faldaprevir (FDV) for GT-1b baseline samples within the TN, 20 mg, QD dose group. n = number of patients with VL and EC<sub>50</sub> data shown. \*Placebo includes GT1b and/or GT1a patients.

A.

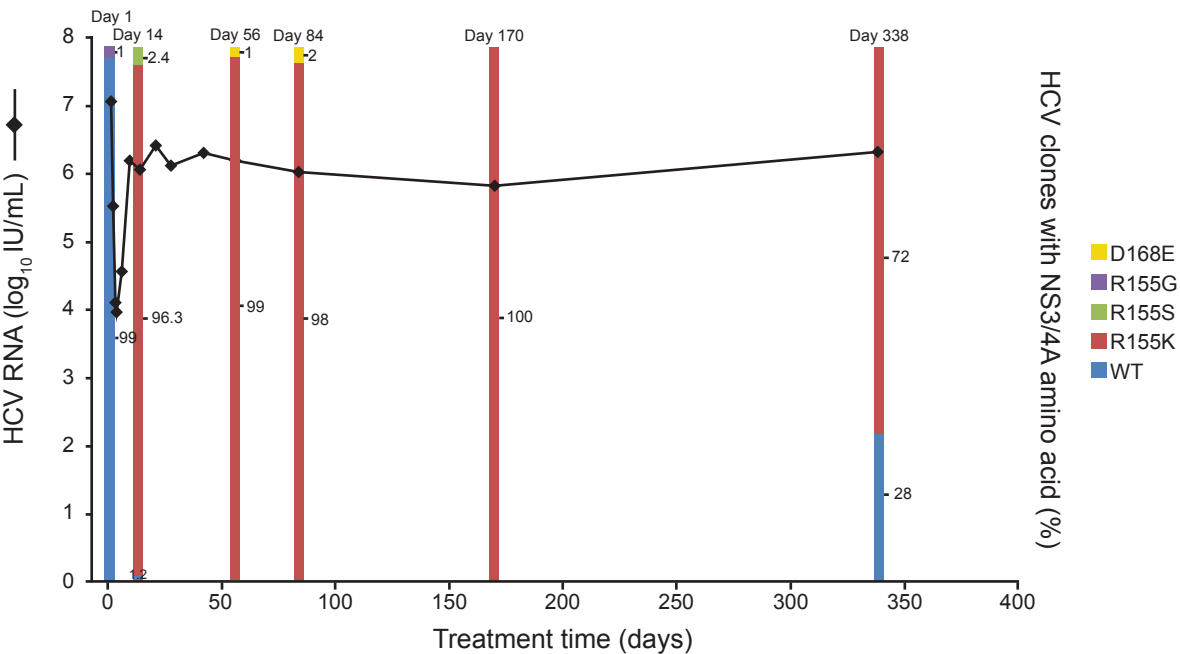

B.

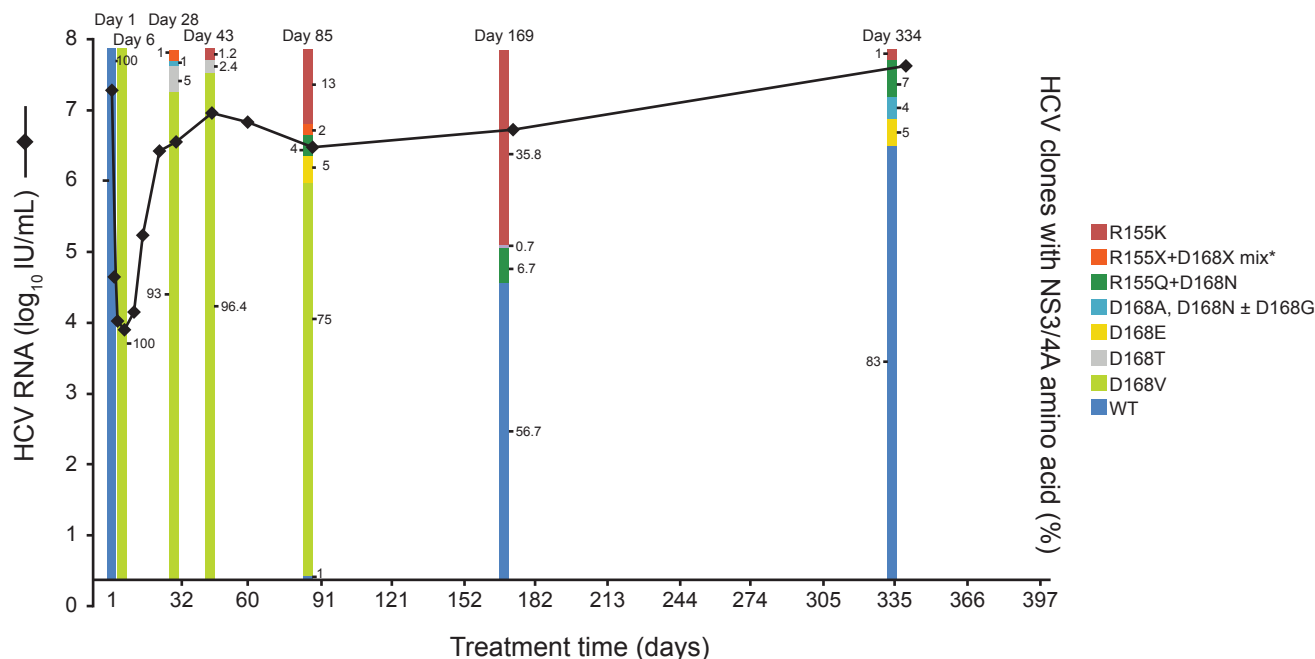

Supplementary FIG 3. Longitudinal clonal sequence analysis. Viral load profiles of virologic breakthrough and % of clones encoding NS3 R155 and/or D168 substitutions over time for representative patients:

(A) TN GT-1a-infected patient from the 20 mg dose group and

(B) TE GT-1b-infected patient from the 48 mg dose group.

\*R155X+D168X mix includes R155Q+D168V, R155S+D168N, or R155K+D168G
